# Supplementary material for: Investigation of reactive species using various gas plasmas
Source: Royal Society of Chemistry journal article supplement (doi:10.1039/c4ra05936k), 2014-01-01
Supplement: c4ra05936k1.pdf [file c4ra05936k1.pdf]

## Supporting Information

Each active species can be detected as ESR signal like Fig. a, d and f. The concentration of reagents, which are TPC,  $\text{NaN}_3$ , DMPO and MGD-Fe solution, was decided as largely reacted concentration based on Fig. b, c, e and g.

### 1. Singlet oxygen measurement

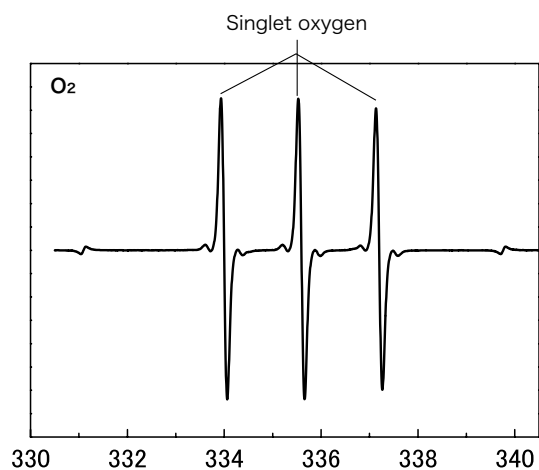

**Figure a.** ESR signal of singlet oxygen adducts (TPC is 75 mM, plasma gas species is oxygen, treatment time is 30 s and flow rate is 1 L/min.)

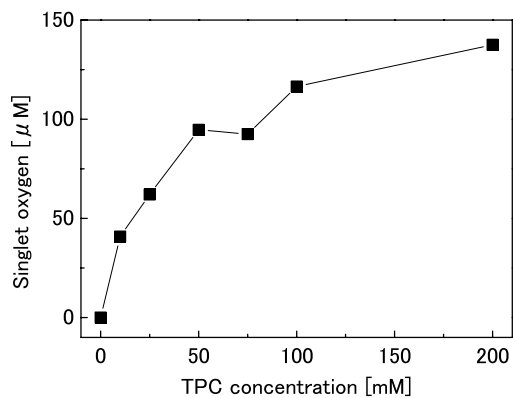

**Figure b.** Relation between TPC concentration and detected singlet oxygen (Plasma gas species is oxygen, treatment time is 30 s and flow rate is 1 L/min.)

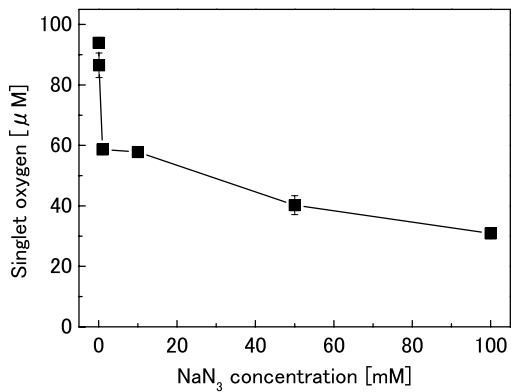

**Figure c.** Singlet oxygen scavenging ability of  $\text{NaN}_3$  (Plasma gas species is oxygen, treatment time is 30 s and flow rate is 1 L/min.)

## 2. OH radical measurement

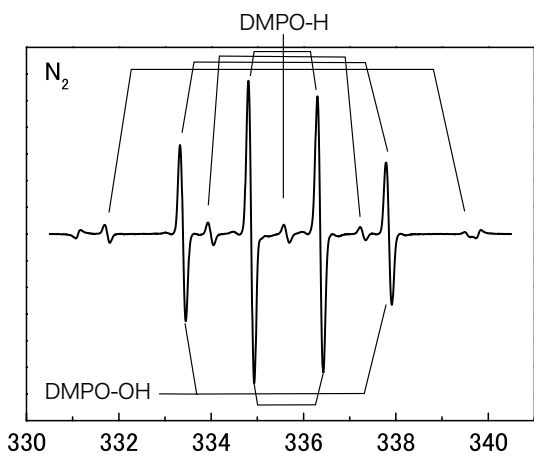

**Figure d.** ESR signal of OH radical and H radical adducts (DMPO is 200 mM, plasma gas species is nitrogen, treatment time is 30 s and flow rate is 1 L/min.)

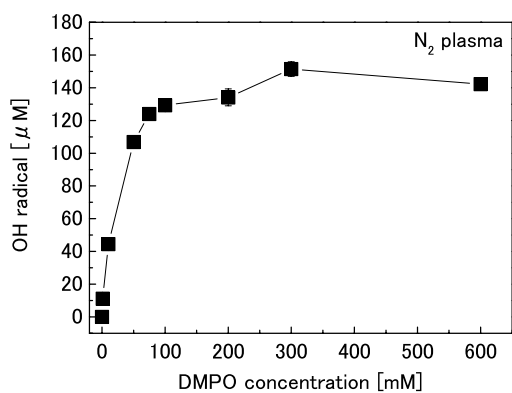

**Figure e.** Relation between DMPO concentration and detected OH radical (Plasma gas species is nitrogen, treatment time is 30 s and flow rate is 1 L/min.)

## 2. NO radical measurement

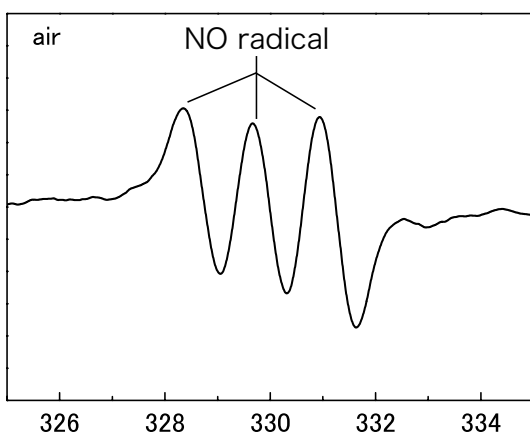

**Figure f.** ESR signal of NO radical adducts (MGD-Fe is 8 mM, plasma gas species is mock air, treatment time is 30 s and flow rate is 1 L/min.)

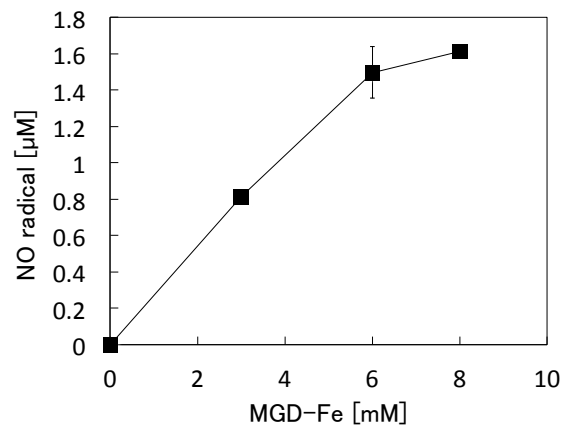

**Figure g.** Relation between MGD-Fe concentration and detected NO radical (Plasma gas species is mock air, treatment time is 30 s and flow rate is 1 L/min.)
